# Supplementary material
Source: Research Square preprint supplement (doi:10.21203/rs.3.rs-9504971/v1)
Supplement: Supplementary file 1 [file 3b66d53cb961bc0405d5ec8f.docx]

**Table:1S** Experimental design of the seed germination tests

| Parameter for seed germination | Germination Test |
| --- | --- |
| Test Plant species | *Ricinus communis* L*.* |
| Pretreatment | 1% Hydrogen peroxide solution for 5min |
| Temperature | 25 ±1℃ |
| Light Type | Natural Sunlight |
| Type of Material | Plastic pots |
| Quantity of Soil Sample | 1.5 kg/pot |
| Total number of seeds potted | 20 seeds/pot |
| Total Replicates | 3 |
| Water control and dilution of water | Deionized water |
| Duration of experiment | 4 weeks (28days) |
| Pesticide concentration | 100mg/kg and 200mg/kg |
|  |  |

**Table:2S** Raw data of Production of IAA by bacterial sp. C-78 at different time intervals (48, 72, and 96h). A) Tryptophan supplemented with CP(100mg) and B) Tryptophan supplemented with CP(200mg) , Values are expressed as Mean ± SD (n = 3) at different time intervals during chlorpyrifos degradation

A.

| Trp (µg/mL) | Time (h) | CP1 | CP2 | CP3 | Mean ± | SD |
| --- | --- | --- | --- | --- | --- | --- |
| 50 | 48 | 12.1 | 11.8 | 12.5 | **12.13 ±** | **0.35** |
| 50 | 72 | 18.2 | 17.9 | 18.5 | **18.20 ±** | **0.30** |
| 50 | 96 | 20.5 | 20.1 | 21.0 | **20.53 ±** | **0.45** |
| 100 | 48 | 20.3 | 19.8 | 20.7 | **20.27 ±** | **0.45** |
| 100 | 72 | 28.5 | 27.9 | 29.1 | **28.50 ±** | **0.60** |
| 100 | 96 | 32.0 | 31.5 | 32.8 | **32.10 ±** | **0.65** |
| 150 | 48 | 25.6 | 24.9 | 26.2 | **25.57 ±** | **0.65** |
| 150 | 72 | 35.2 | 34.5 | 36.0 | **35.23 ±** | **0.75** |
| 150 | 96 | 40.5 | 39.8 | 41.2 | **40.50 ±** | **0.70** |

| Trp (µg/mL) | Time (h) | CP1 | CP2 | CP3 | Mean ± | SD |
| --- | --- | --- | --- | --- | --- | --- |
| 50 | 48 | 8.6 | 8.2 | 9.0 | **8.60 ±** | **0.40** |
| 50 | 72 | 12.5 | 12.0 | 13.0 | **12.50 ±** | **0.50** |
| 50 | 96 | 14.2 | 13.8 | 14.8 | **14.27 ±** | **0.50** |
| 100 | 48 | 14.5 | 14.0 | 15.1 | **14.53 ±** | **0.55** |
| 100 | 72 | 20.8 | 20.1 | 21.5 | **20.80 ±** | **0.70** |
| 100 | 96 | 24.0 | 23.2 | 24.8 | **24.00 ±** | **0.80** |
| 150 | 48 | 18.9 | 18.2 | 19.5 | **18.87 ±** | **0.65** |
| 150 | 72 | 26.5 | 25.8 | 27.3 | **26.53 ±** | **0.75** |
| 150 | 96 | 30.2 | 29.5 | 31.0 | **30.23 ±** | **0.75** |

B.

A.

C-42

C-38

C-15

C-35

C-17

**
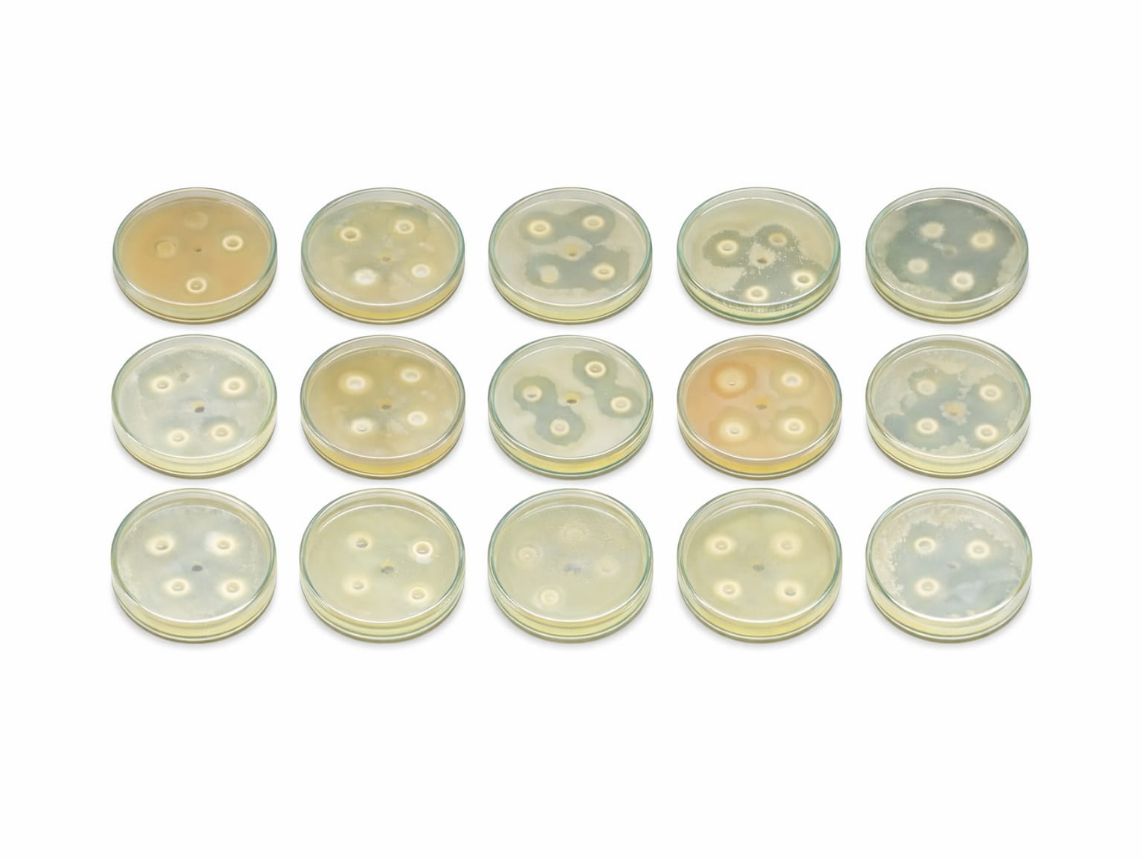
**

C-60

C-58

C-62

C-55

C-80

C-78

C-72

C-68

C-65

C-45

**
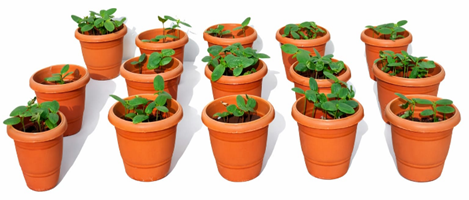

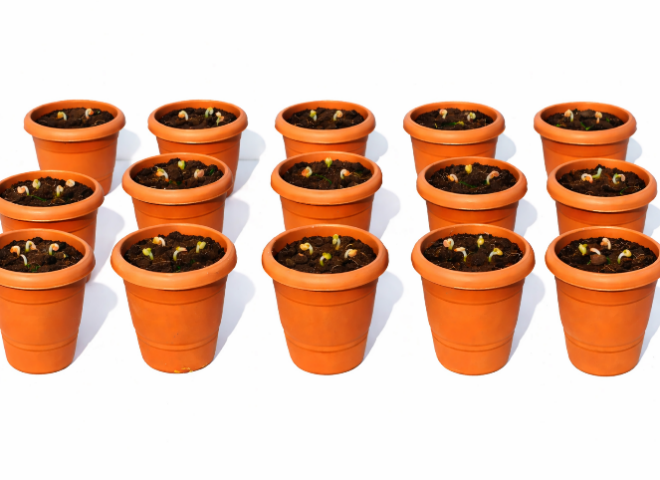
**

B.

Day-14

Day-7

Day-28

Day-21

**
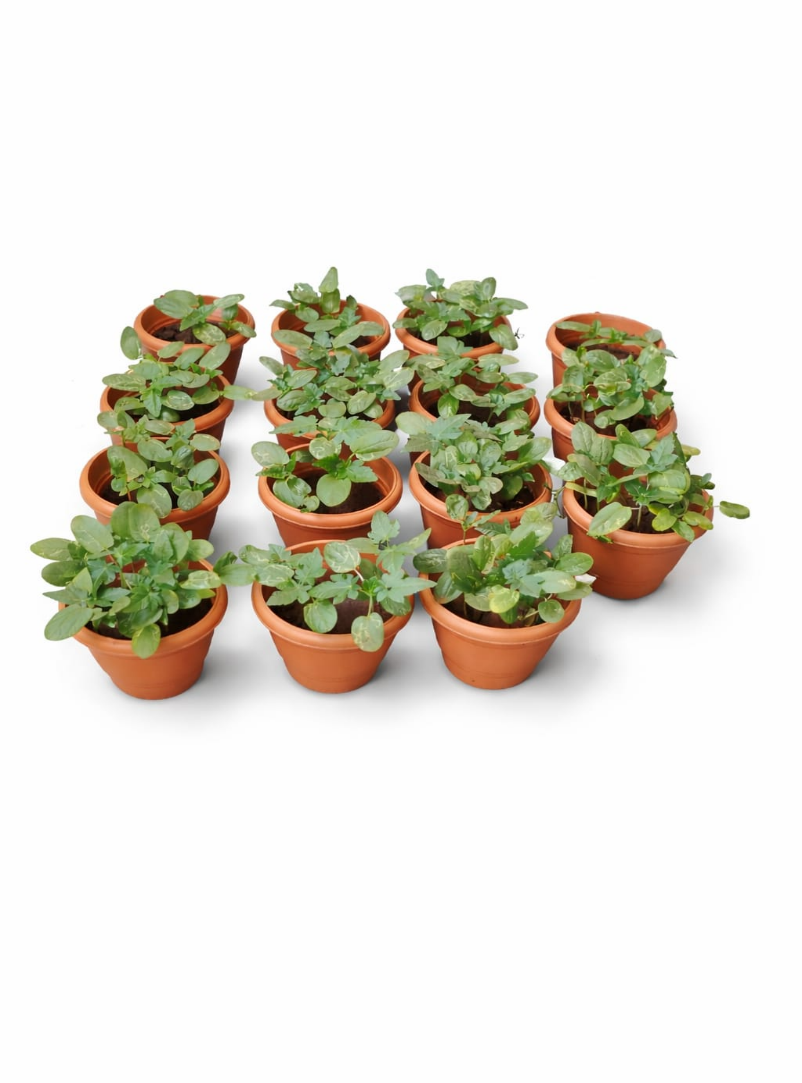
**

**
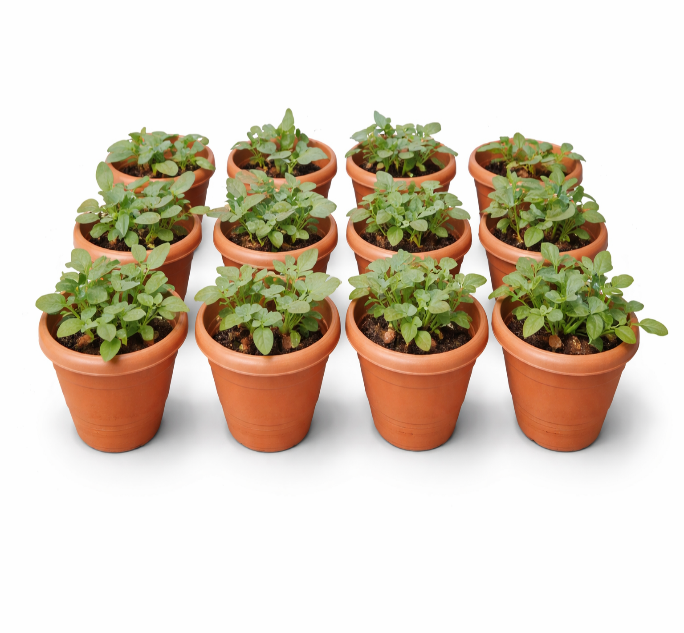
**

C.

**
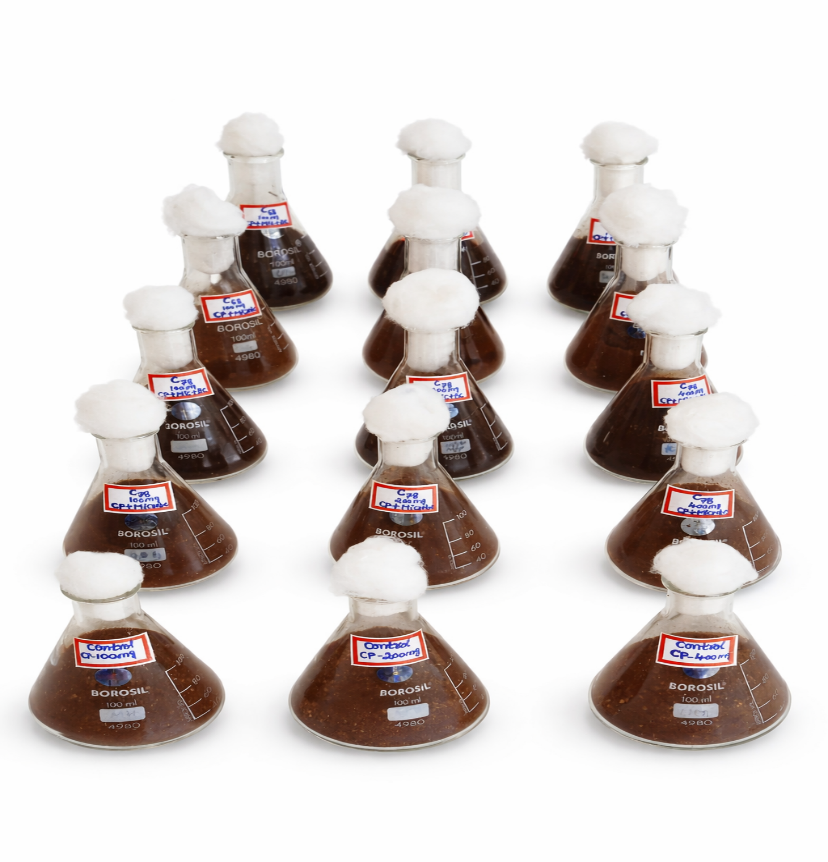
**

**Figure 1S** Preliminary screening of : A) Potential CPF tolerant bacterial strain through MIC assay B) Potting experimental trials for screening of potential CPF-degrading plant *Ricinus communis* L. C) CPF degradation ability in soil under in-vitro conditions by selected isolated strains

**
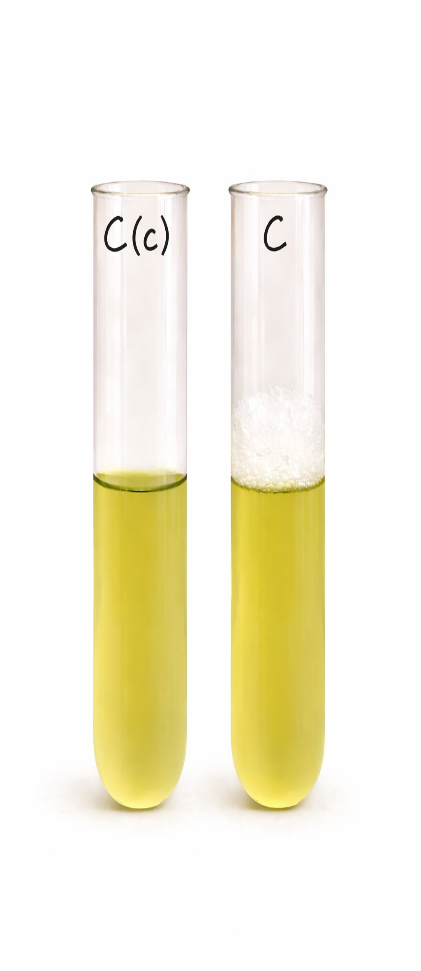

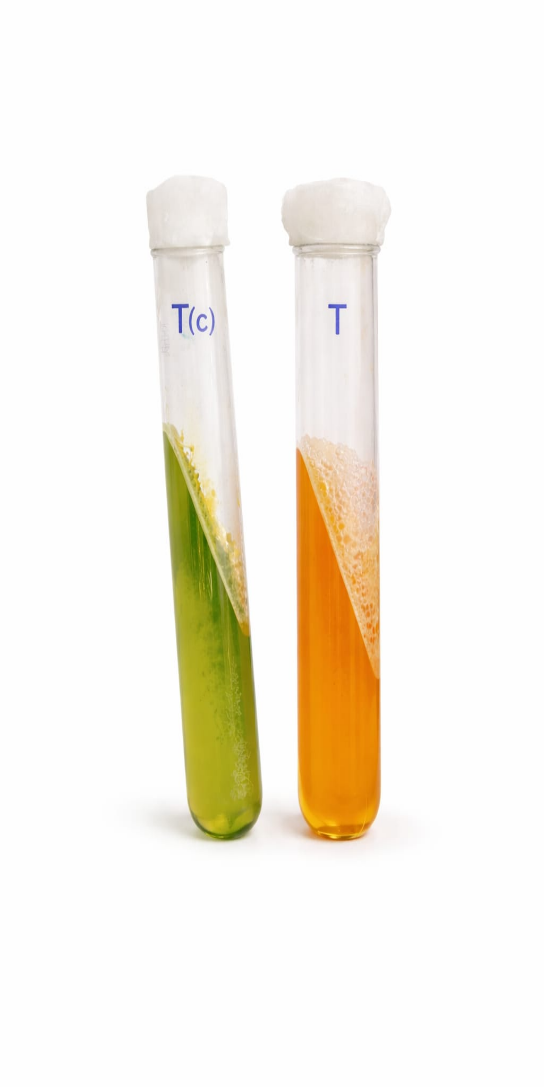

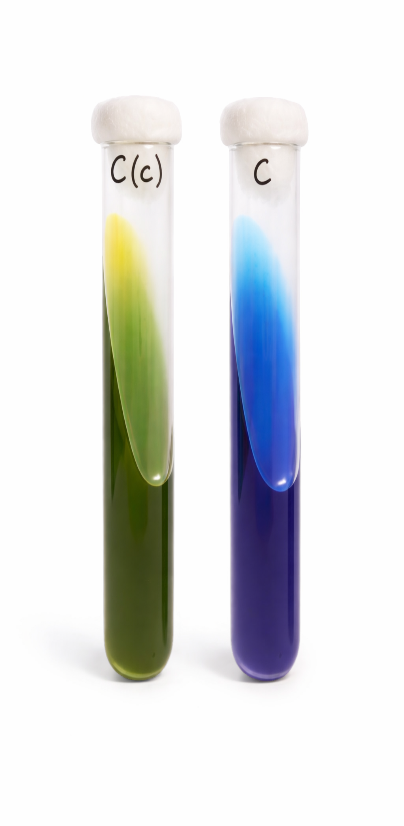

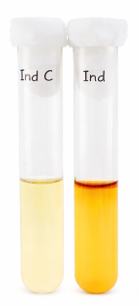

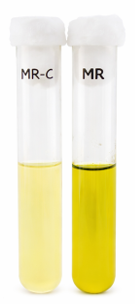

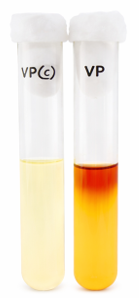

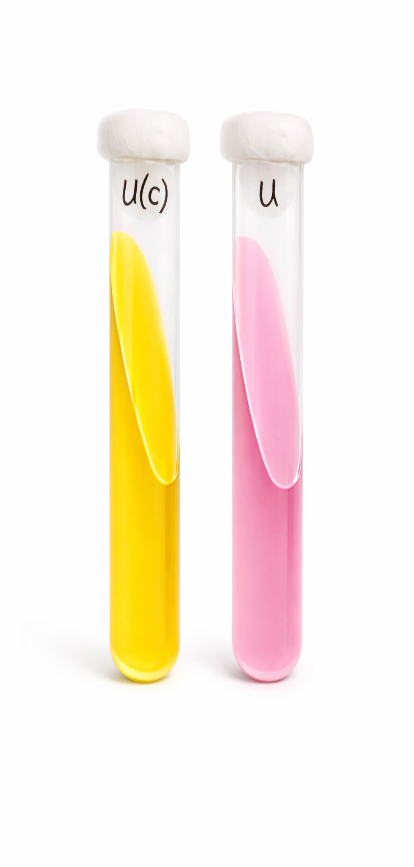
**

Indole

Urease

Citrate

Voges proskauer

Methyl red

**
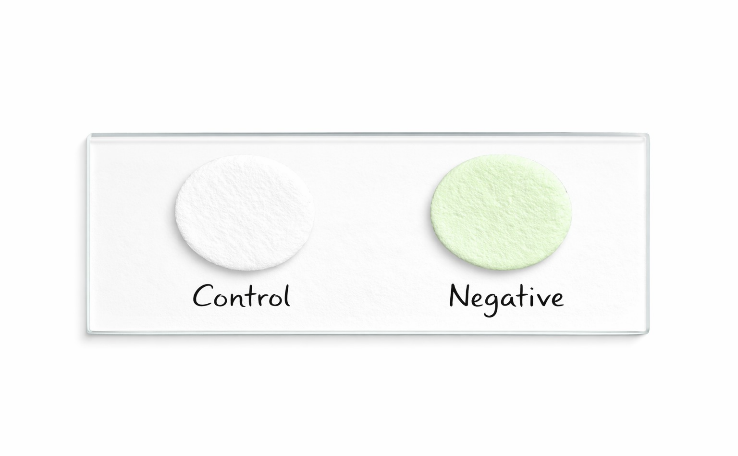

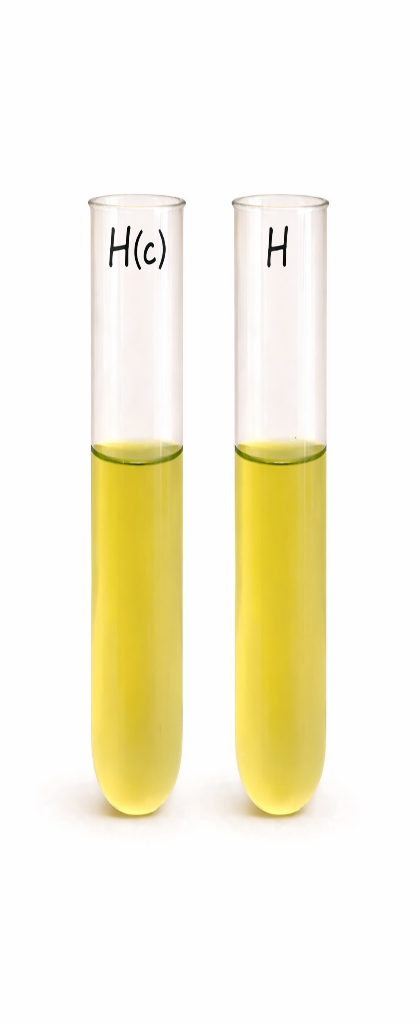
**

Oxidase

Triple sugar iron

H2S

Catalase

**Figure 2S** The biochemical characterization for the isolate C-78(*klebsiella pneumoniae*), including Indole production, Methyl red (MR), Voges proskauer (VP), citrate utilisation, Urease, Triple sugar iron test, Catalase, oxidase, and H2S test.


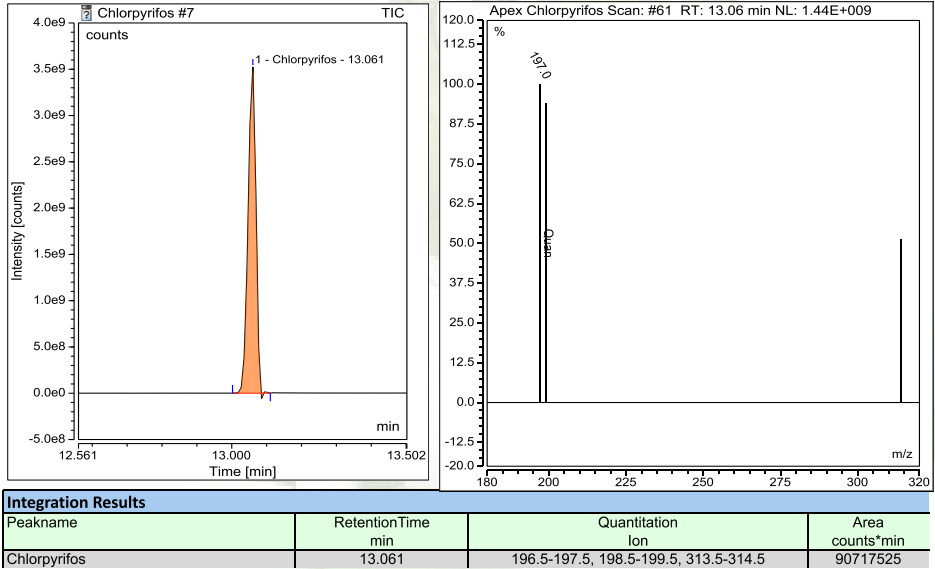


**Figure 3S** GC-MS chromatogram of Standard Chlorpyrifos


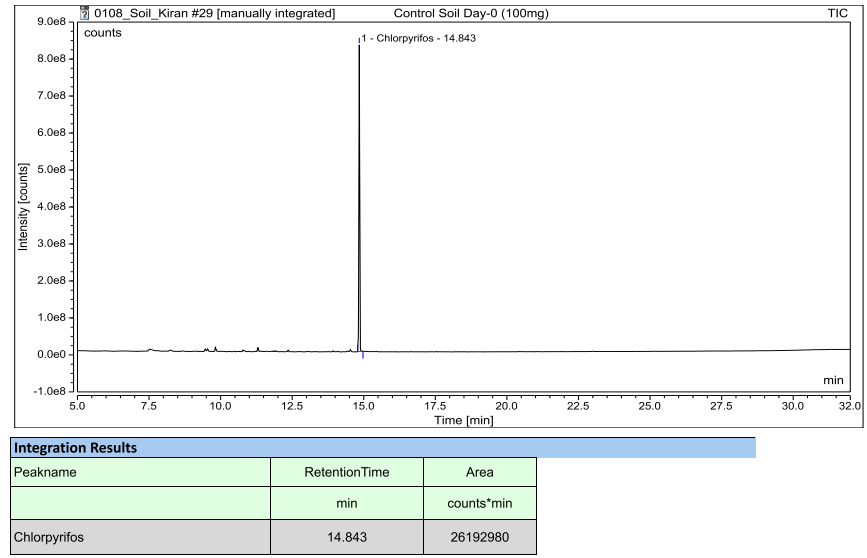


**Figure 4S** GC-MS chromatogram of Day-0 CP-100mg soil sample


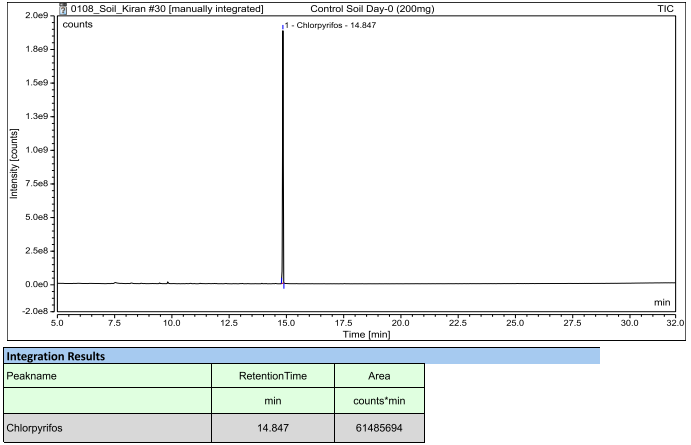


**Figure 5S** GC-MS chromatogram of Day-0 CP-200mg soil sample


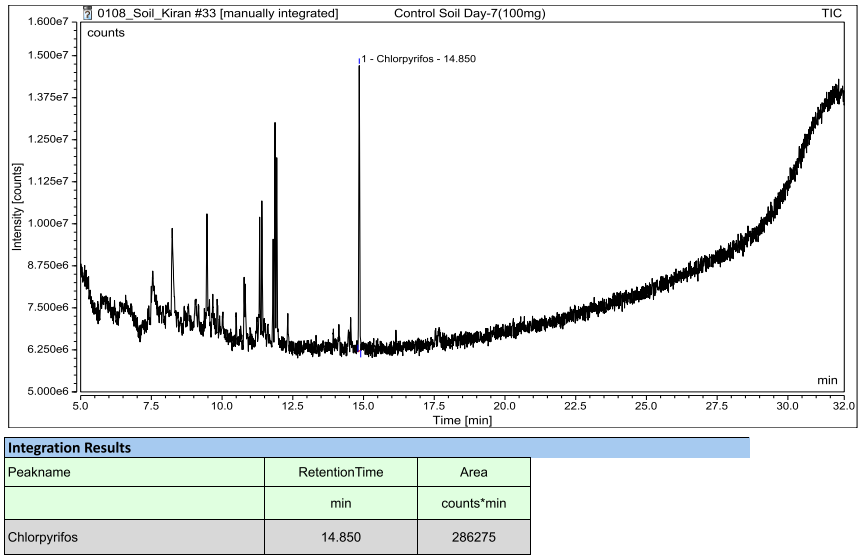


**Figure 6S** GC-MS chromatogram of Day-7 CP-100mg soil sample

**
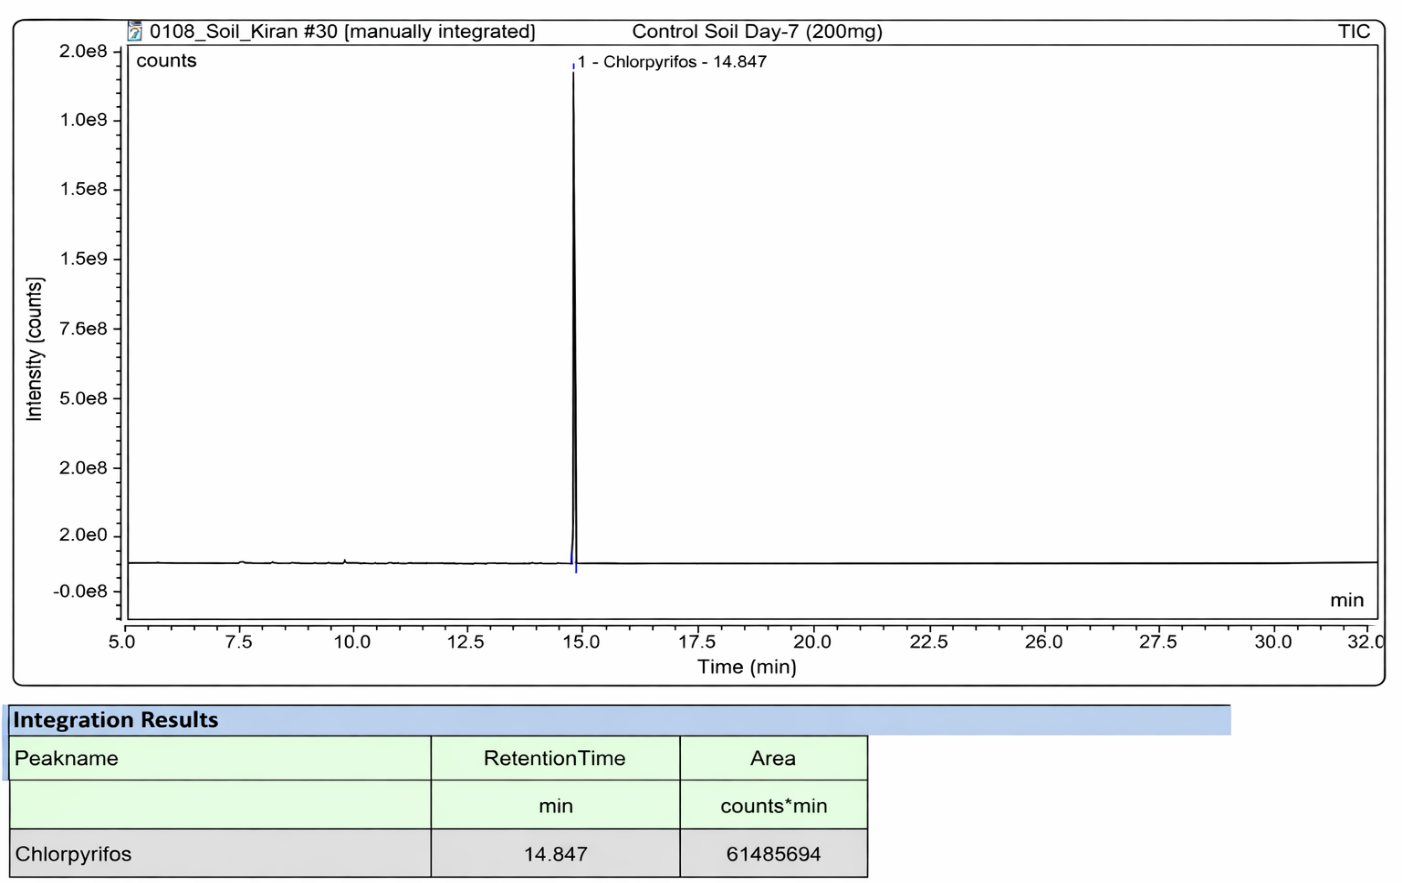
**

**Figure 7S** GC-MS chromatogram of Day-7 CP-200mg soil sample


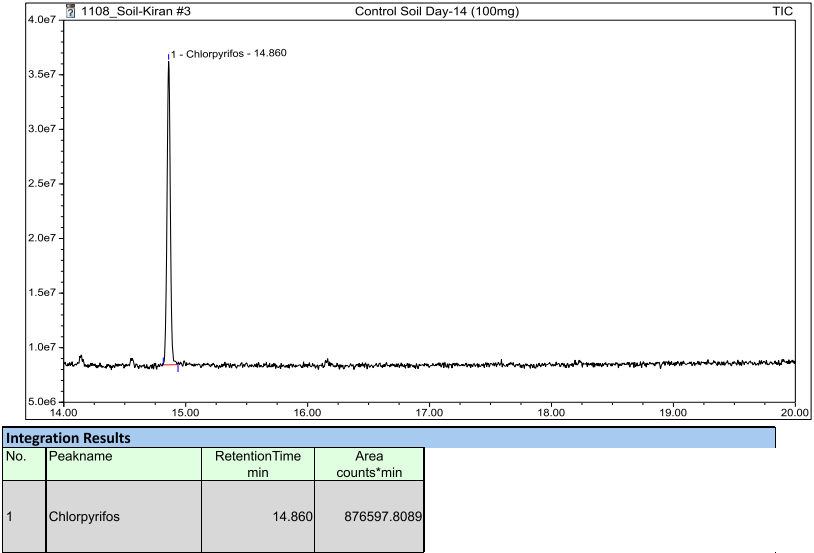


**Figure 8S** GC-MS chromatogram of Day-14 CP-100mg soil sample


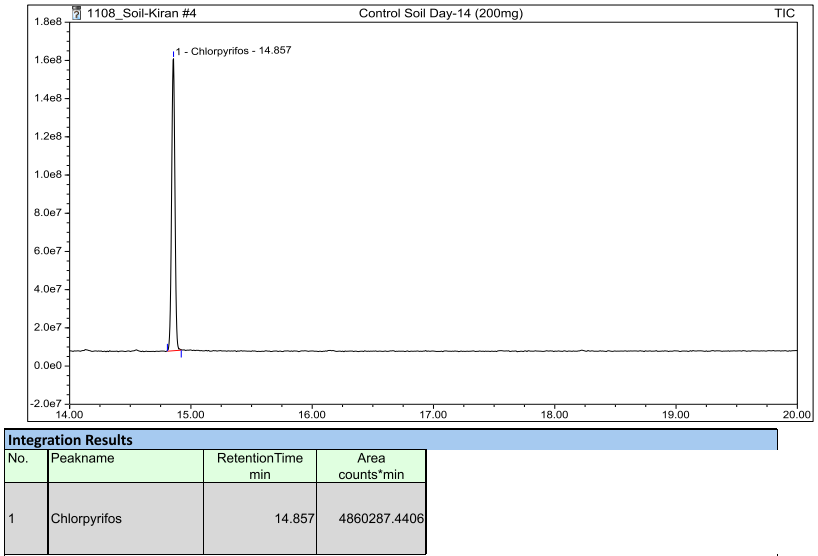


**Figure 9S** GC-MS chromatogram of Day-14 CP-200mg soil sample


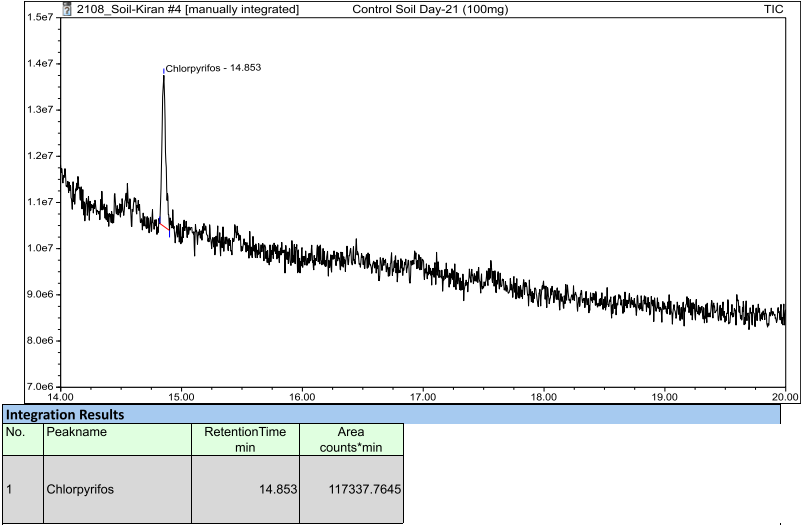


**Figure 10S** GC-MS chromatogram of Day-21 CP-100mg soil sample

**
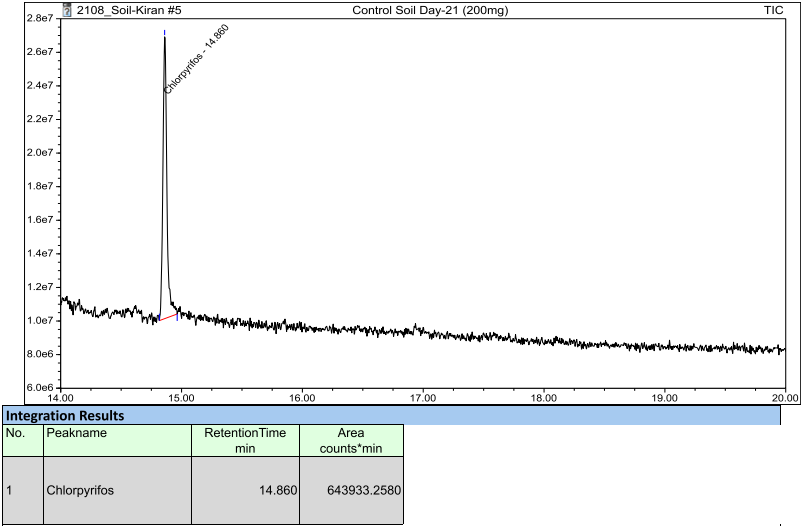
**

**Figure 11S** GC-MS chromatogram of Day-21 CP-200mg soil sample


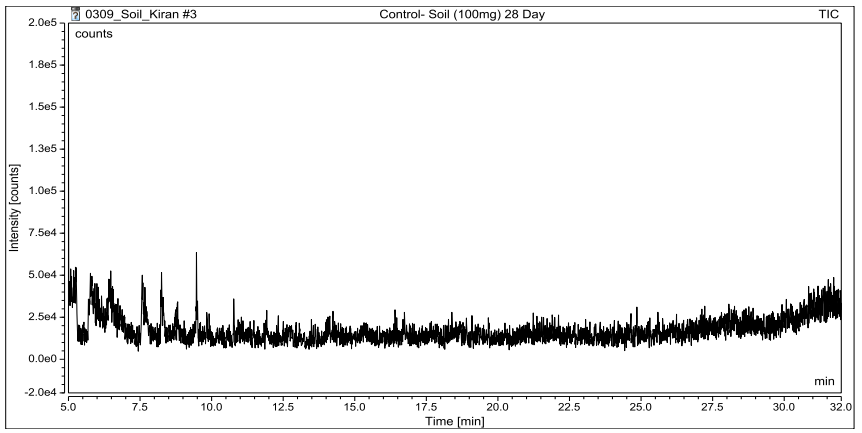


**Figure 12S** GC-MS chromatogram of Day-28 CP-100mg soil sample


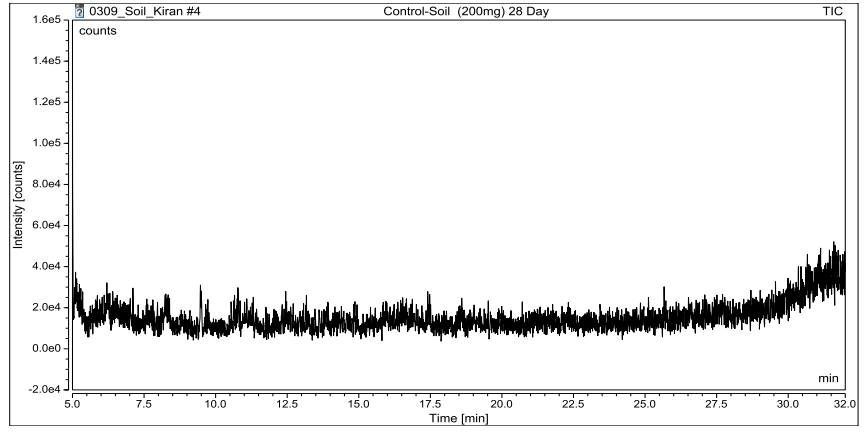


**Figure 13S** GC-MS chromatogram of Day-28 CP-200mg soil sample

**
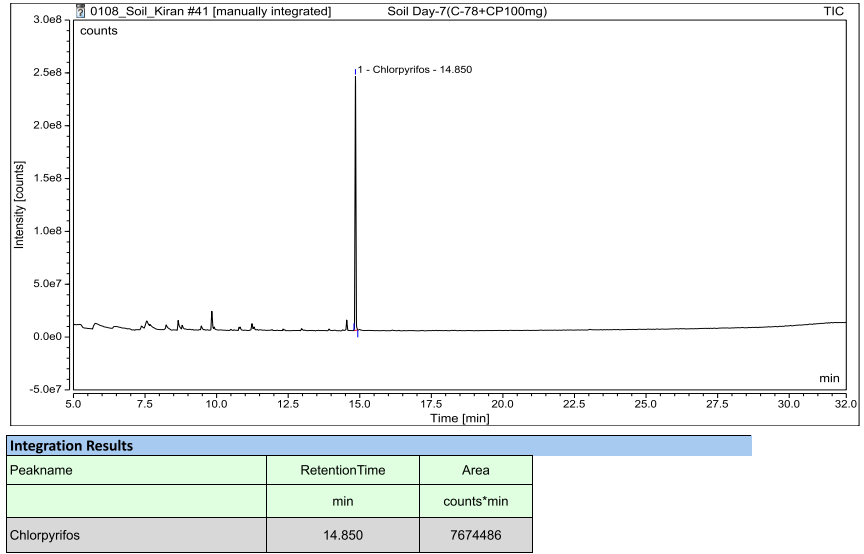
**

**Figure 14S** GC-MS chromatogram of Day-7 (C-78 + CP-100mg) soil sample


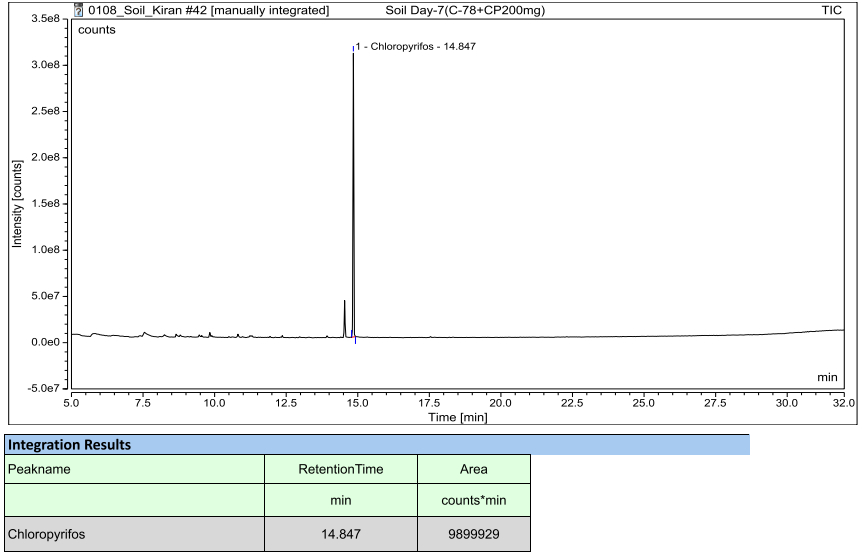


**Figure 15S** GC-MS chromatogram of Day-7 (C-78 + CP-200mg) soil sample


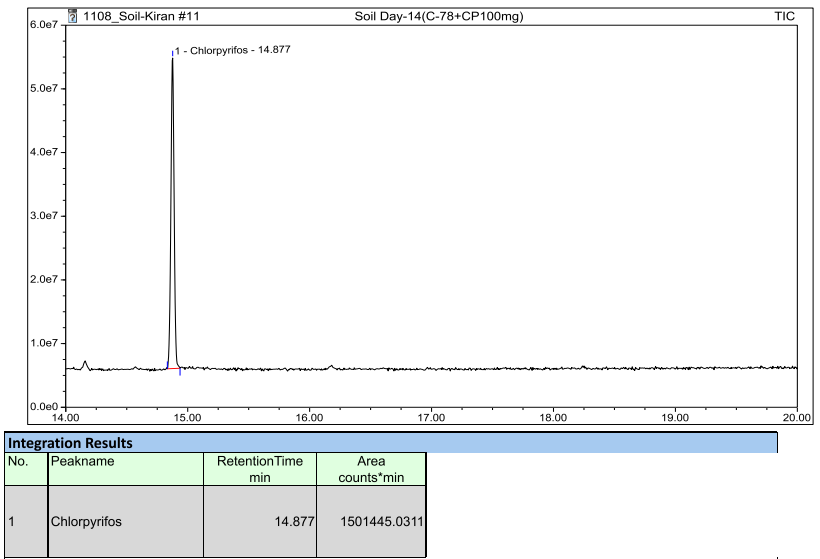


**Figure 16S** GC-MS chromatogram of Day-14 (C-78 + CP-100mg) soil sample


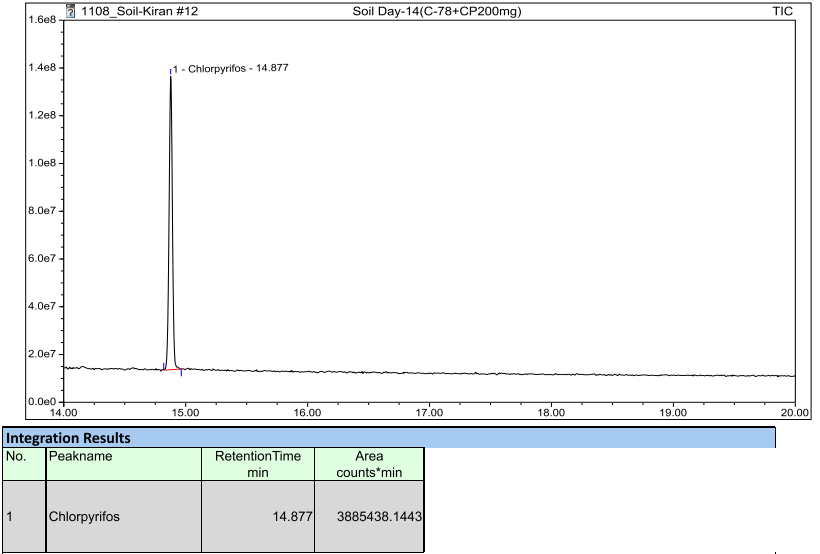


**Figure 17S** GC-MS chromatogram of Day-14 (C-78 + CP-200mg) soil sample


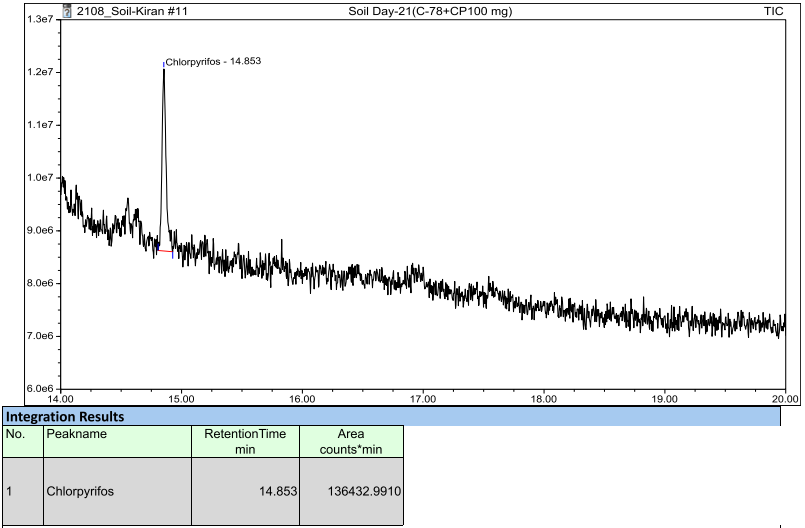


**Figure 18S** GC-MS chromatogram of Day-21 (C-78 + CP-100mg) soil sample


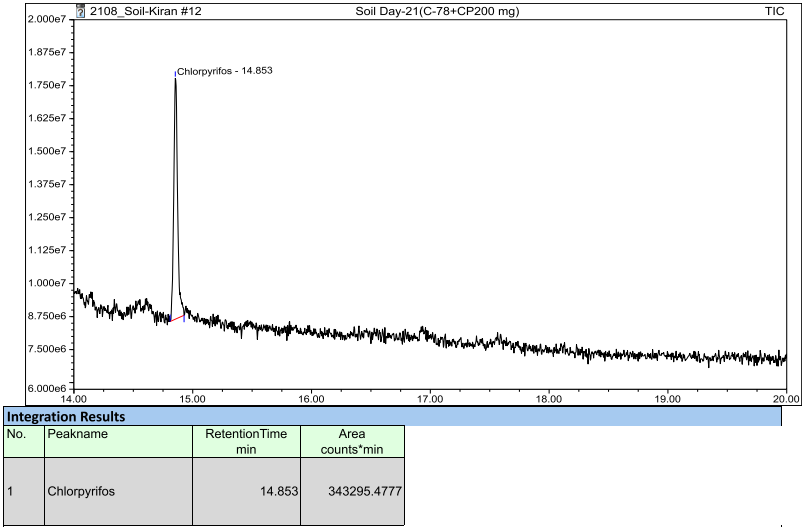


**Figure 19S** GC-MS chromatogram of Day-21 (C-78 + CP-200mg) soil sample


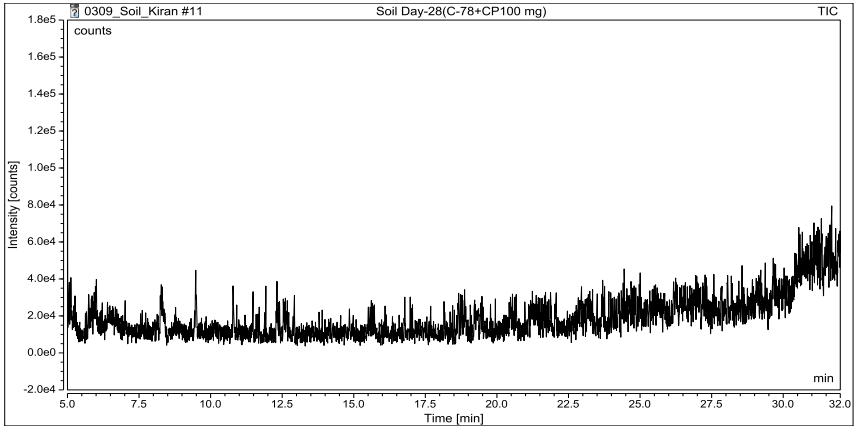


**Figure 20S** GC-MS chromatogram of Day-28 (C-78 + CP-100mg) soil sample

**
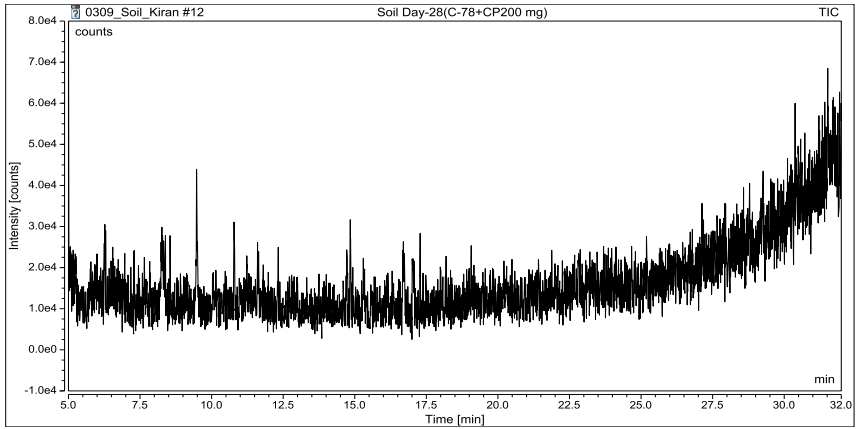
**

**Figure 21S** GC-MS chromatogram of Day-28 (C-78 + CP-200mg) soil sample


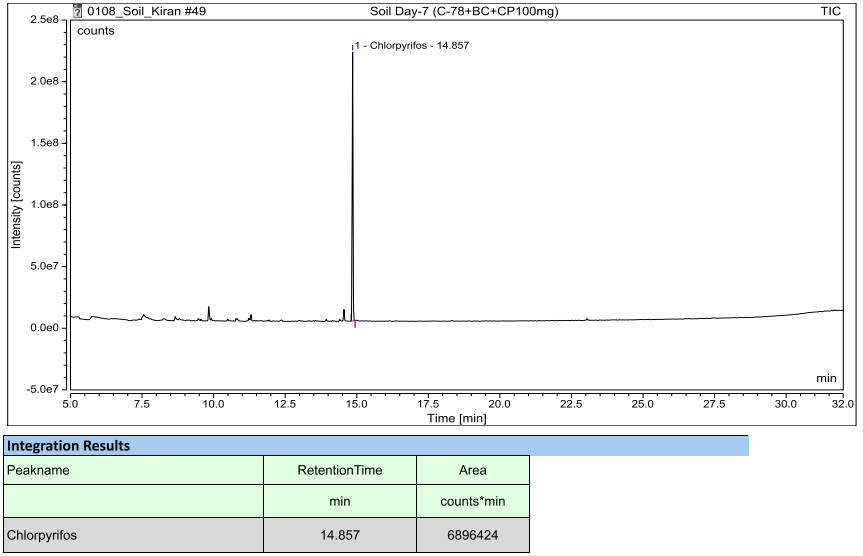


**Figure 22S** GC-MS chromatogram of Day-7 (C-78 +BC+ CP-100mg) soil sample


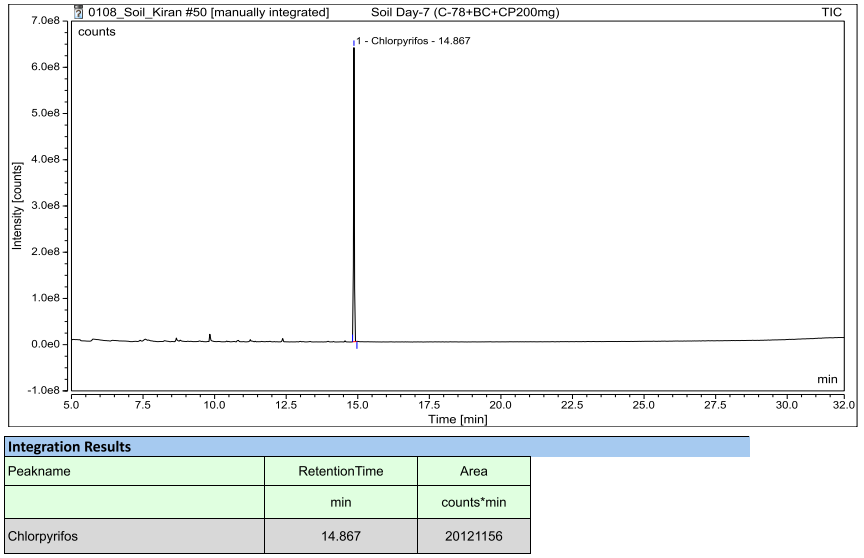


**Figure 23S** GC-MS chromatogram of Day-7 (C-78 +BC+ CP-200mg) soil sample

**
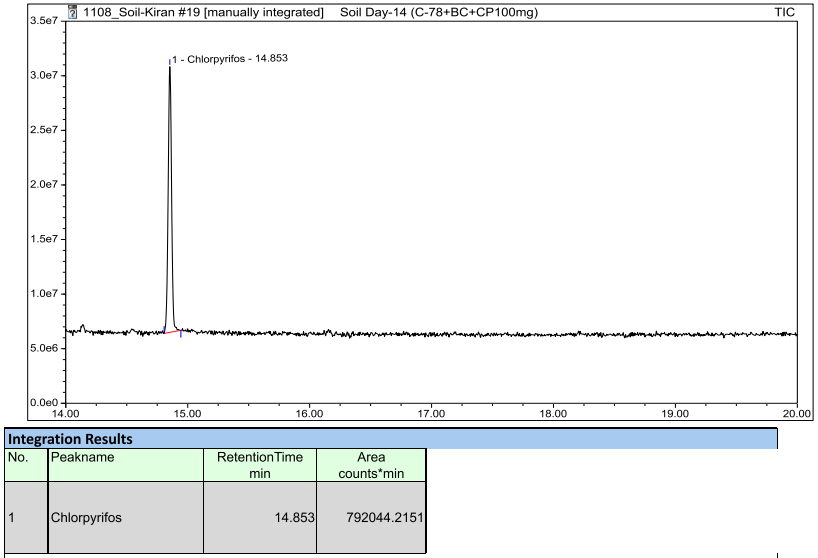
**

**Figure 24S** GC-MS chromatogram of Day-14 (C-78 +BC+ CP-100mg) soil sample


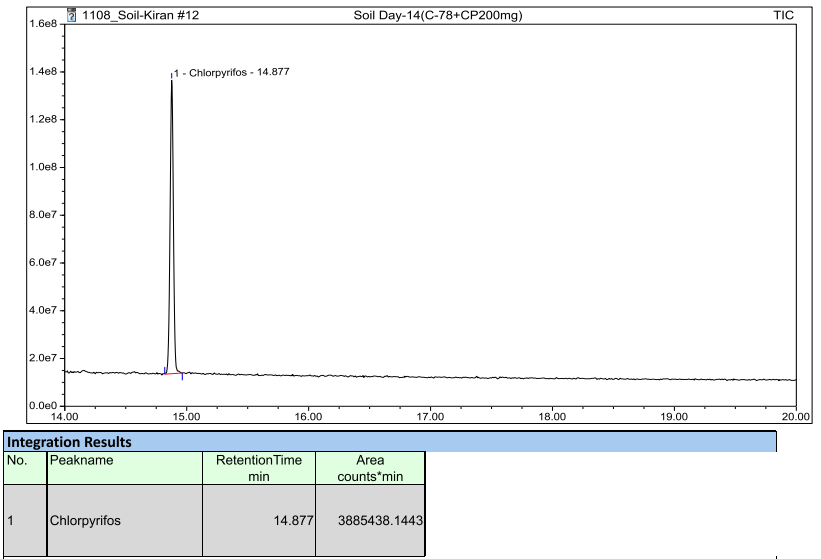


**Figure 25S** GC-MS chromatogram of Day-14 (C-78 +BC+ CP-200mg) soil sample


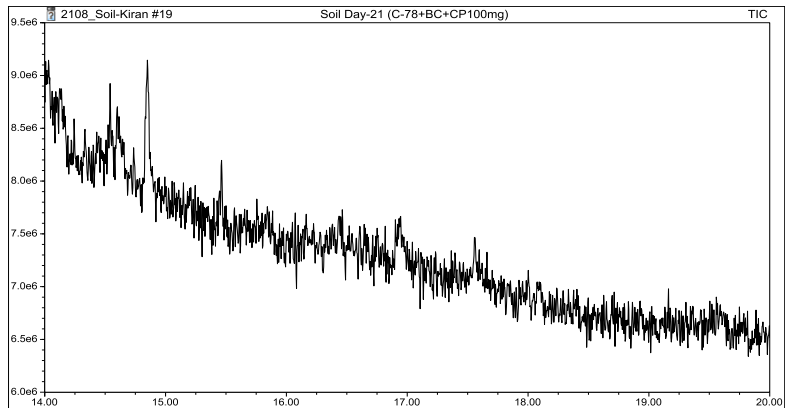


**Figure 26S** GC-MS chromatogram of Day-21 (C-78 +BC+ CP-100mg) soil sample

**
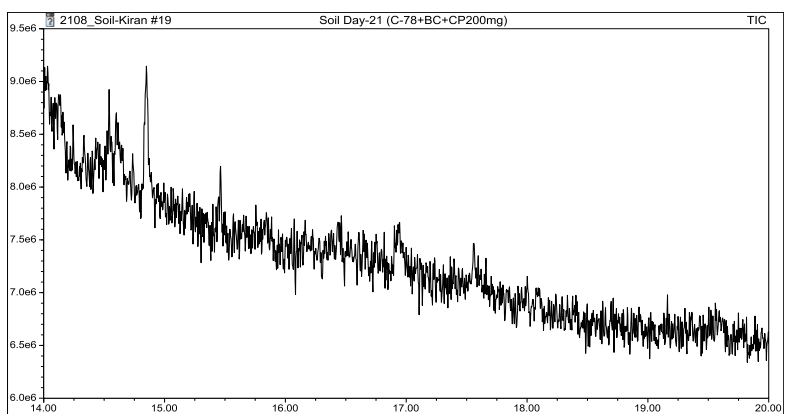
**

**Figure 27S** GC-MS chromatogram of Day-21 (C-78 +BC+ CP-200mg) soil sample


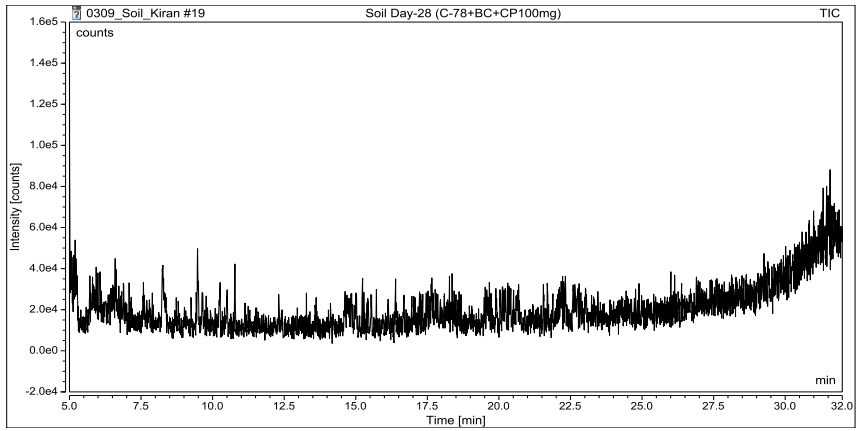


**Figure 28S** GC-MS chromatogram of Day-28 (C-78 +BC+ CP-100mg) soil sample


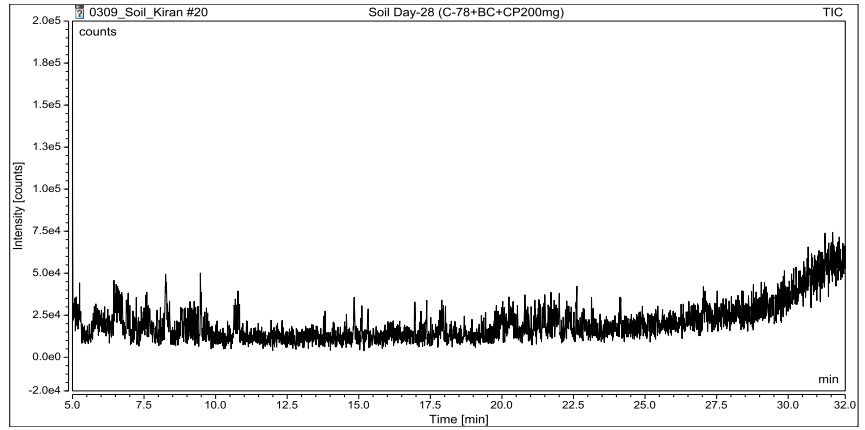


**Figure 29S** GC-MS chromatogram of Day-28 (C-78 +BC+ CP-200mg) soil sample
