# Supplementary material
Source: Research Square preprint supplement (doi:10.21203/rs.3.rs-9504971/v1)
Supplement: Supplementary file 2 [file 620ad2d432cbe1619ff55bc0.docx]

**Table:1.** The Biochemical characterization of isolate C-78

| *Klebsiella pneumoniae* | |
| --- | --- |
| Types of Biochemical Test | Results |
| Indole production | - |
| Methyl red | - |
| Voges proskauer | + |
| Catalase | + |
| Triple sugar Agar | + |
| Simmon’s citrate | + |
| Urease | + |
| Oxidase | - |
| H2S | - |

Source: (Rosa et al., 2016)

*Results based on types of the substrate utilisation: Positive (+) and Negative (-)

**Table .2.** Measurement of growth parameters of *Ricinus communis* L*.* in different microbiologically active soils supplemented with CPF (200 mg kg−1).

| Growth parameters | Control | CPF +Castor bean | CPF + Castor bean+ C-78 | CPF + Castor bean+  C-78+Biochar |
| --- | --- | --- | --- | --- |
| % germination | 88.5 ± 0.0** | 83.5± 0.0* | 90.6 ± 6.4* | 92.6 ± 7.2* |
| Shoot length (cm) | 19.1 ± 0.36* | 15.1 ± 0.3* | 21.6 ±0.35* | 22.9 ± 0.36* |
| Root length (cm) | 20.1 ± 0.36* | 13.1 ± 0.31* | 23.2 ± 0.78* | 25.4 ± 0.82* |
| Leaf length (cm) | 3.03 ± 0.15* | 3.07 ± 0.15* | 5.15 ± 0.13* | 5.20 ± 0.1* |
| Shoot fresh weight (g) | 2.23 ± 0.07* | 1.94 ± 0.11* | 2.83 ± 0.10* | 2.40 ± 0.09* |
| Root fresh weight (g) | 0.9 ± 0.03* | 0.55 ± 0.07* | 1.96 ± 0.10* | 2.14 ± 0.06* |
| Shoot dry weight (g) | 0.3 ± 0.035* | 0.18 ± 0.006* | 0.7 ± 0.03* | 0.8 ± 0.01* |
| Root dry weight (g) | 0.1 ± 0.008* | 0.08 ± 0.007* | 0.25 ± .013* | 0.26 ± .003* |

The values indicate the mean ± SD of three replicates.

Note: Mean (n  =  3)  ±  SD. at *p<0.05, **p<0.001 compare with control
